# Supplementary material for: Estimation of the Seasonal Inhaled Deposited Dose of Particulate Matter in the Respiratory System of Urban Individuals Living in an Eastern Mediterranean City
Source: MDPI journal article supplement (doi:10.3390/ijerph19074303), 2022-04-03
Supplement: s1 [file s1]

## Supplementary Martial

### *Estimation of the Seasonal Inhaled Deposited Dose of Particulate Matter in the Respiratory System of Urban Individuals Living in an Eastern Mediterranean City*

Hussein et al.

#### S1. Geographical location

Jordan is a small country in the Middle East, located at the crossroads of the Levantine and Arabian regions. Syria borders the country on the north, Iraq on the east, and Saudi Arabia on the east and south. Jordan's only sea outlet, the Gulf of Aqaba, lies to the south, while Palestine is to the west. Jordan is similar in size to Austria or Portugal, with a total area of 96,188 square kilometers including the Dead Sea. Western Jordan has a Mediterranean climate with two short transitional seasons, a hot, dry summer, and a mild, wet winter. However, roughly 75% of the country has a desert environment with annual precipitation of less than 200 mm.

Amman is the capital of Jordan and is located in the northern-western part of the country. The current population of Amman is about 4.5 millions (as per year 2021), which is about 42% of the Jordanian total population (about 10.8 millions). The number of males and females in Amman is roughly about 2.4 millions (50.63 %) and 2.1 (49.37 %); respectively. These fractions are still the same throughout the whole population of Jordan.

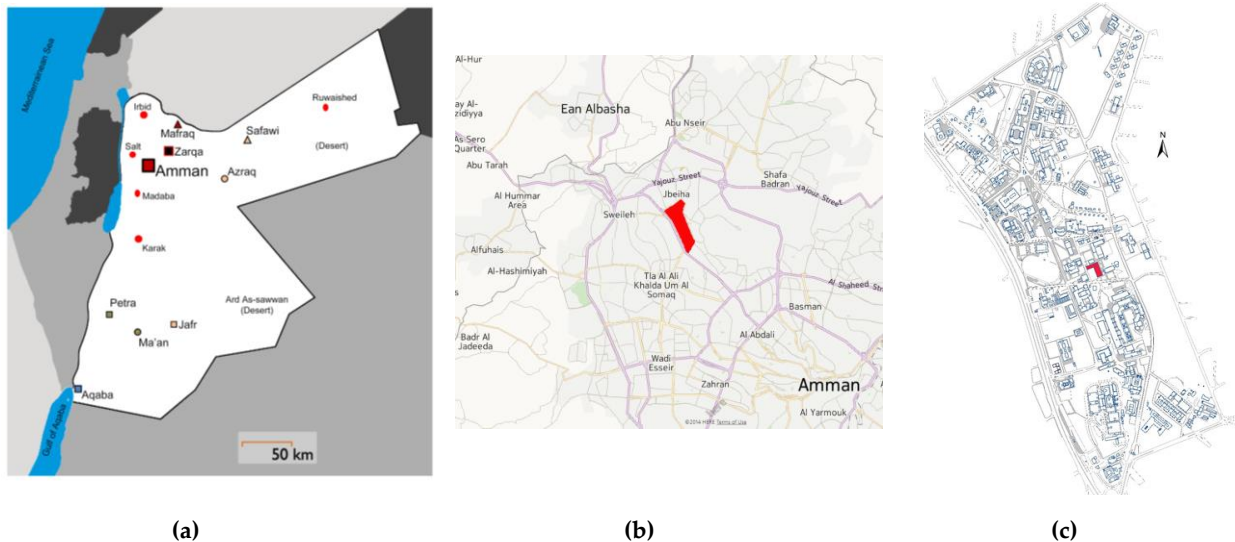

**Figure S1:** (a) A Map of Jordan showing the geographical location of Amman. (b) A Map of Amman showing the campus of the University of Jordan (shaded area) and (c) a detailed map of the campus of the University of Jordan, showing the sampling location (shaded area) in the middle of the campus.

## S2. Aerosol measurements

The particle number size distribution was measured with a scanning mobility particle sizer (NanoScan SMPS 3910, TSI, Minnesota, U.S.) and an optical particle sizer (OPS 3330, TSI, Minnesota, U.S.). Using the NanoScan SMPS (electrical equivalent mobility diameter: 0.01–0.42  $\mu\text{m}$ , 13 channels at dry conditions) and the OPS (optical diameter: 0.3–10  $\mu\text{m}$ , 13 channels at dry conditions) can provide a useful setup to monitor a wide particle diameter range 0.01–10  $\mu\text{m}$ . However, combining the measurement results of these two instruments is challenging as will be pointed out in the next section.

The NanoScan SMPS consists of four main built-in components: (1) a cyclone inlet to remove large particles, (2) unipolar particle charger, (3) a radial differential mobility analyzer (RDMA), and (4) an isopropanol-based condensation particle counter (CPC). The particle number size distribution scan was 60 s (45 s upscan and 15 s downscan). The inlet flow rate was 0.75 lpm ( $\pm 20\%$ ) whereas the sample flow rate was 0.25 lpm ( $\pm 10\%$ ).

The OPS measured the particle number size distribution using the TSI default particle size bins, which consisted of 13 equally sized bins based on a lognormal scale. The dead-time correction was applied in the OPS operation. Sampling time-resolution was 5 min with a flow rate  $\sim 1$  lpm.

The total number concentration of submicron aerosols was measured with a portable condensation particle counter (CPC 3007-2, TSI, Minnesota, U.S.). The cutoff size of this CPC was 10 nm and it was capable of measuring submicron particle number concentration of aerosols with diameters up to 2  $\mu\text{m}$ . According to the specifications provided by the manufacturer, the maximum detectable concentration was  $10^5 \text{ cm}^{-3}$  with 20% accuracy. The sampling flow rate was 0.1 lpm (inlet flow rate 0.7 lpm).

Each instrument had its own aerosol sampling inlet ( $\sim 1$ -m-long and 8 mm inner diameter) which was led through the wall to sample the outdoor aerosols. Each inlet consisted of short Tygon tubes (4 mm inner diameter) connected to a diffusion drier (TSI model 3062-NC). The diffusion drier was used to remove the excess moisture from the aerosol sample.

The aerosol transport efficiency through the aerosol inlet assembly was determined experimentally: ambient aerosol sampling alternatively with and without inlet. The aerosol data was corrected accordingly (Figure S2). The penetration efficiency was  $\sim 47\%$  for 10 nm,  $\sim 93\%$  for 0.3  $\mu\text{m}$ , and  $\sim 40\%$  for 10  $\mu\text{m}$  particles. Accordingly, the particle number size distributions were corrected for losses in the tubing and the diffusion drier.

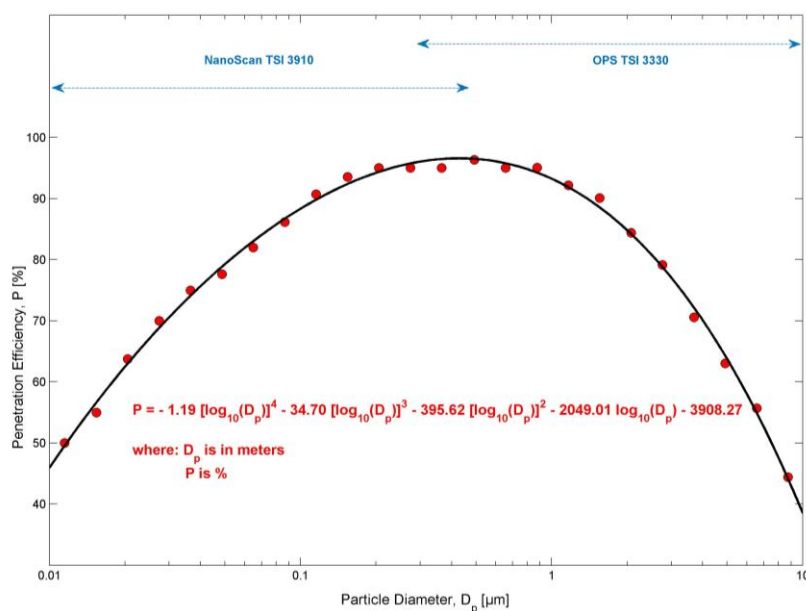

**Figure S2:** Experimental penetration efficiency through the sampling lines (tubing and diffusion drier).

### S3. Data handling

The measurement time-resolution of the SMPS and the CPC was 1 min and of the OPS was 5 min. In order to construct a wide range of the measured particle number size distribution, we performed the following steps: (1) calculated the 5-min average of the SMPS data, (2) omitted the last two channels in the SMPS (i.e., remaining diameter range was 0.01–0.25  $\mu\text{m}$ ), (3) omitted the first channel in the OPS (i.e., remaining diameter range was 0.32–10  $\mu\text{m}$ ), and (4) merged the two distributions. As such, we obtained a combined particle number size distribution covering the diameter range 0.01–10  $\mu\text{m}$ .

We calculated the particle number concentration ( $\text{cm}^{-3}$ ) within four particle diameter ranges (size-fractionated number concentration): 0.01–0.025  $\mu\text{m}$  (nucleation), 0.025–0.1  $\mu\text{m}$  (Aitken), 0.1–1  $\mu\text{m}$  (accumulation), and 1–10  $\mu\text{m}$  (coarse). Consequently, the total number concentration was obtained as the sum of all these fractions. The size-fractionated number concentrations were obtained by integrating (practically summation) the measured particle number size distribution over the specified particle diameter range

$$PN_{D_{p2}-D_{p1}} = \int_{D_{p1}}^{D_{p2}} n_N^0 d \log_{10}(D_p), \quad (\text{S1})$$

where  $n_N^0 = dN/d \log_{10}(D_p)$  is the measured particle number size distribution and  $D_p$  is the particle diameter.

The processed aerosol data (including all size-fractionated data) was then converted to hourly statistical analysis. This hourly averaged data was then used to calculate the daily and monthly statistical values. The statistical analysis included average, standard deviation, median, minimum, maximum, and percentiles (5%, 25%, 75%, and 95%) of valid number of data points, and percentage of valid data points.

### S4. Regional Inhaled Deposited Dose Rate

According to the ICRP and MPPD models, the respiratory tract is divided into three main regions: head/throat, tracheobronchial (TB), and pulmonary/alveolar (P/Alv). Following our previous methods as described by Hussein, et al. (Hussein et al. 2013, Hussein et al. 2015, Hussein et al. 2019, Hussein et al. 2020), we can calculate the regional inhaled deposited dose for a specific particle diameter range ( $D_{p1}$ – $D_{p2}$ ) during a one-hour exposure period as a dose rate:

$$\text{Dose Rate} = \int_{D_{p1}}^{D_{p2}} V_E \times DF(D_p) \times n_N^0(D_p) \times f \cdot d \log(D_p) \quad (\text{S2})$$

where  $V_E$  [ $\text{m}^3/\text{h}$ ] is the minute ventilation (volume of air breathed, Table S1),  $DF(D_p)$  is the particle deposition fraction in a particular region of the respiratory tract (Figure S1),  $n_N^0(D_p)$  [particles/ $\text{cm}^3$ ] is the particle number size distribution (i.e.,  $dN/d \log(D_p)$ ), and  $f$  is a metric conversion for the particle concentration (i.e., it is 1 for particle number and for particle mass =  $\rho_p D_p^3 \pi / 6$ , where  $\rho_p$  is the particle effective density). The deposition fraction ( $DF$ ) and the particle number size distribution ( $n$ ) are functions of particle diameter ( $D_p$ ).

The dose rates were calculated for adult male and female subjects reflecting different types of activities (resting, exercising, and conducting yardwork; Table S1 and Figure S3) and different exposure scenarios.

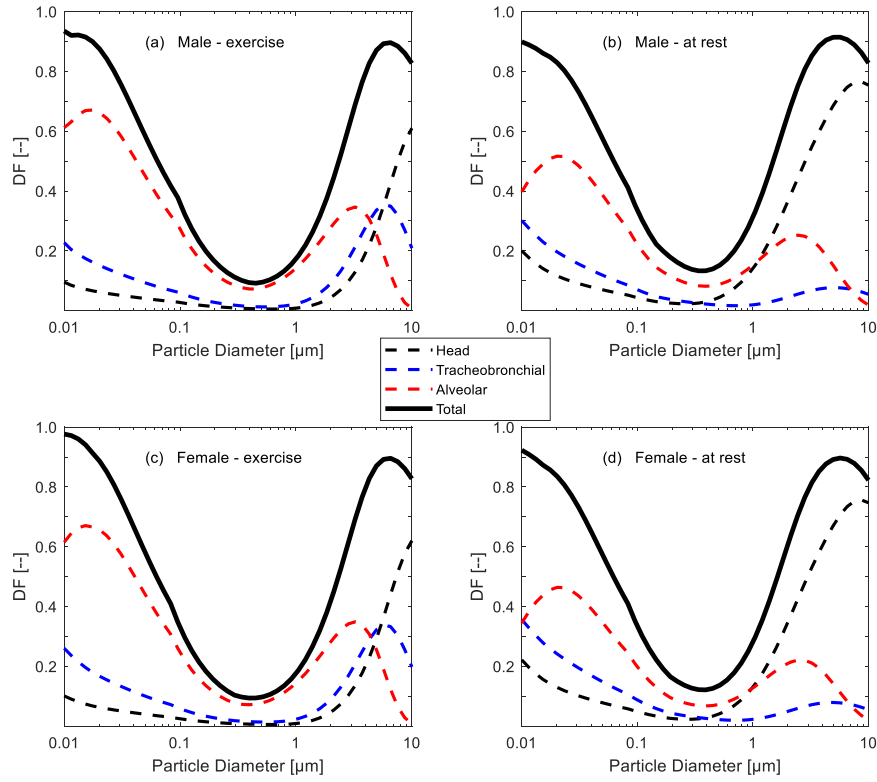

**Figure S3.** Size-resolved deposition fraction ( $DF$ ) curves for the respiratory tract of adult subjects: (a) male exercising, (b) male at rest, (c) female exercising, and (d) female at rest. Data was adopted from Löndahl et al. (2007) and the ICRP and MPPD models (ICRP 1994, Anjilvel and Ashgarian, 1995).

**Table S1.** Minute ventilation (volume of air breathed),  $V_E$  [ $\text{m}^3/\text{h}$ ], for adult subjects according to Holmes (1994). The last column indicates the deposition fraction curve used for the listed activity (Figure S3).

| Activity           | Female | Male | $DF$ Curve Type |
|--------------------|--------|------|-----------------|
| Yardwork           | 1.08   | 1.74 | Exercise        |
| Running (8.0 km/h) | 3.03   | 3.48 | Exercise        |
| Walking (4.0 km/h) | 1.20   | 1.38 | Exercise        |
| Standing           | 0.48   | 0.66 | at rest         |
| Sitting            | 0.42   | 0.54 | at rest         |

## S5. Summary about the aerosol data base and particulate matter concentrations

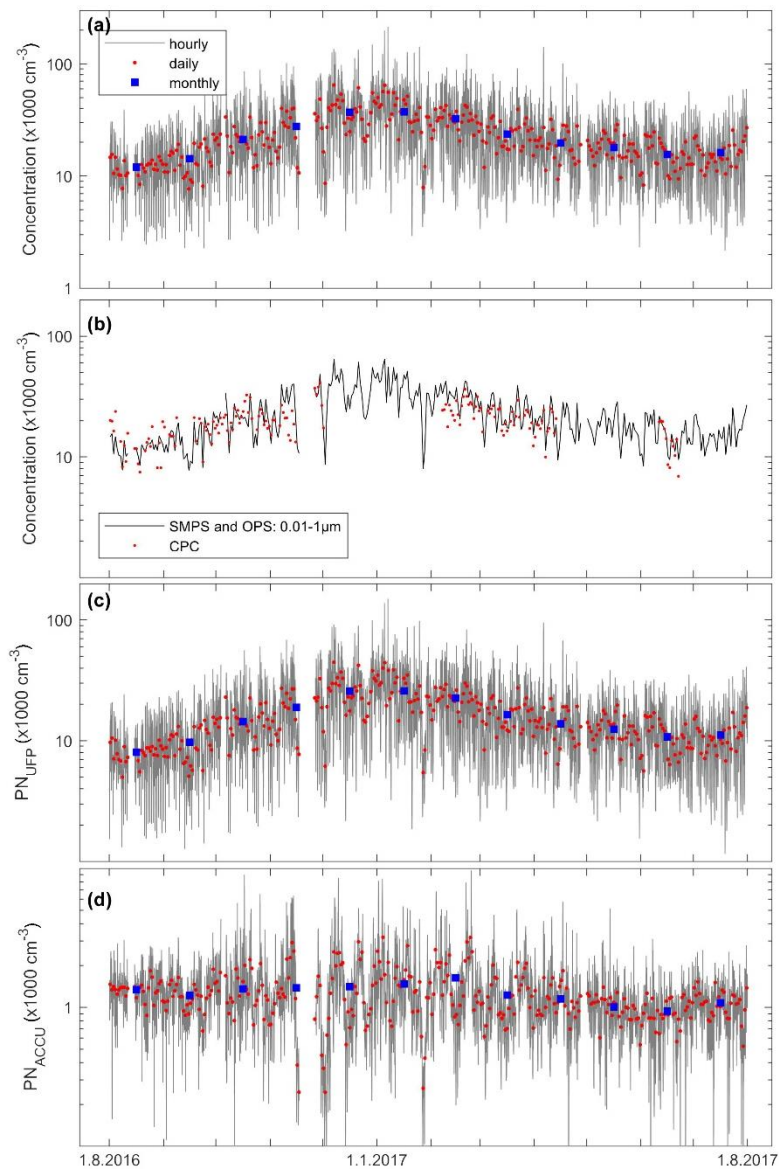

**Figure S4.** Time series of the (a) submicron particle number concentration, (b) comparison between the condensation particle counter (CPC) and scanning mobility particle sizer (SMPS) + optical particle sizer (OPS) particle number concentrations, and (c,d) the main particle size fraction concentrations of ultrafine particles ( $D_p < 0.1 \mu\text{m}$ ) and accumulation mode particles ( $D_p 0.1\text{--}1 \mu\text{m}$ ).

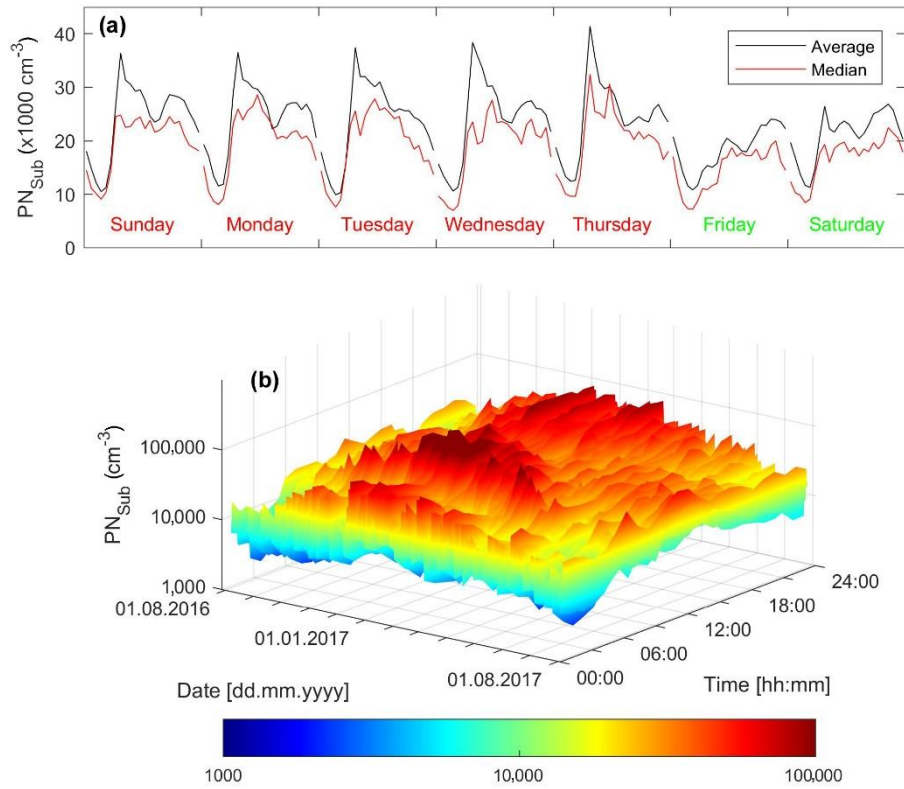

**Figure S5.** (a) Diurnal pattern of the submicron particle number concentration ( $0.01\text{--}1 \mu\text{m}$ ) and (b) date-time spectrum showing the day-to-day and hour-to-hour variation of the number concentration; the color bar scales the number concentration ( $\text{cm}^{-3}$ ).

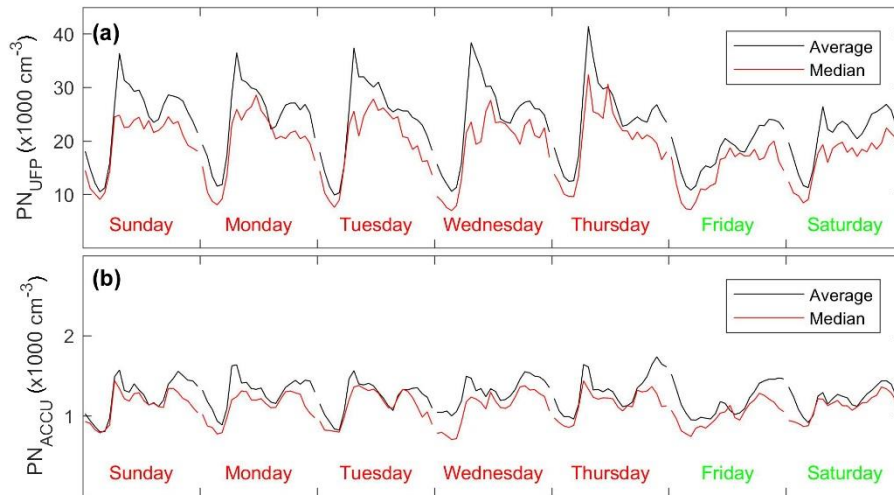

**Figure S6.** Diurnal pattern of the (a) ultrafine particle number concentration (UFP, diameter  $< 0.1 \mu\text{m}$ ) and (b) accumulation mode particle number concentration (diameter  $0.1\text{--}1 \mu\text{m}$ ).



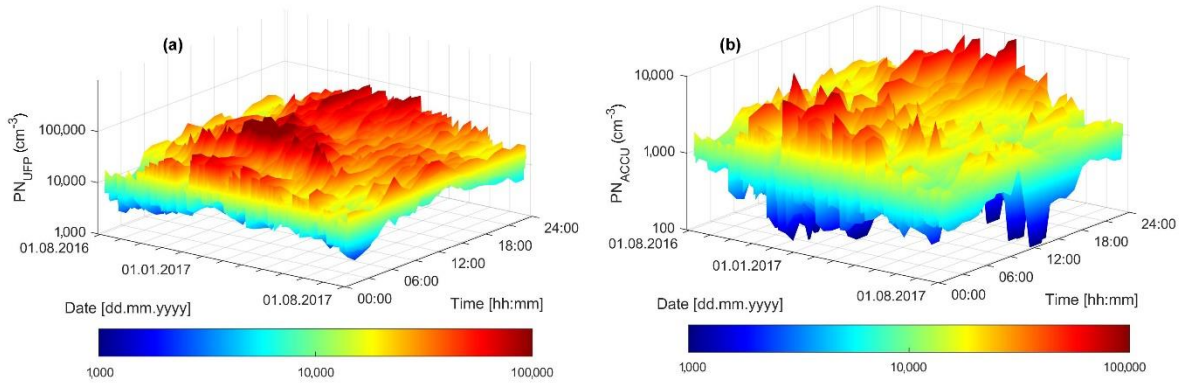

**Figure S7.** Date-time spectra showing the day-to-day and hour-to-hour variation of (a) ultrafine particle number concentration (UFP, diameter < 0.1 μm) and (b) accumulation mode particle number concentration (diameter 0.1–1 μm). The color bar scales the number concentration (cm<sup>-3</sup>).

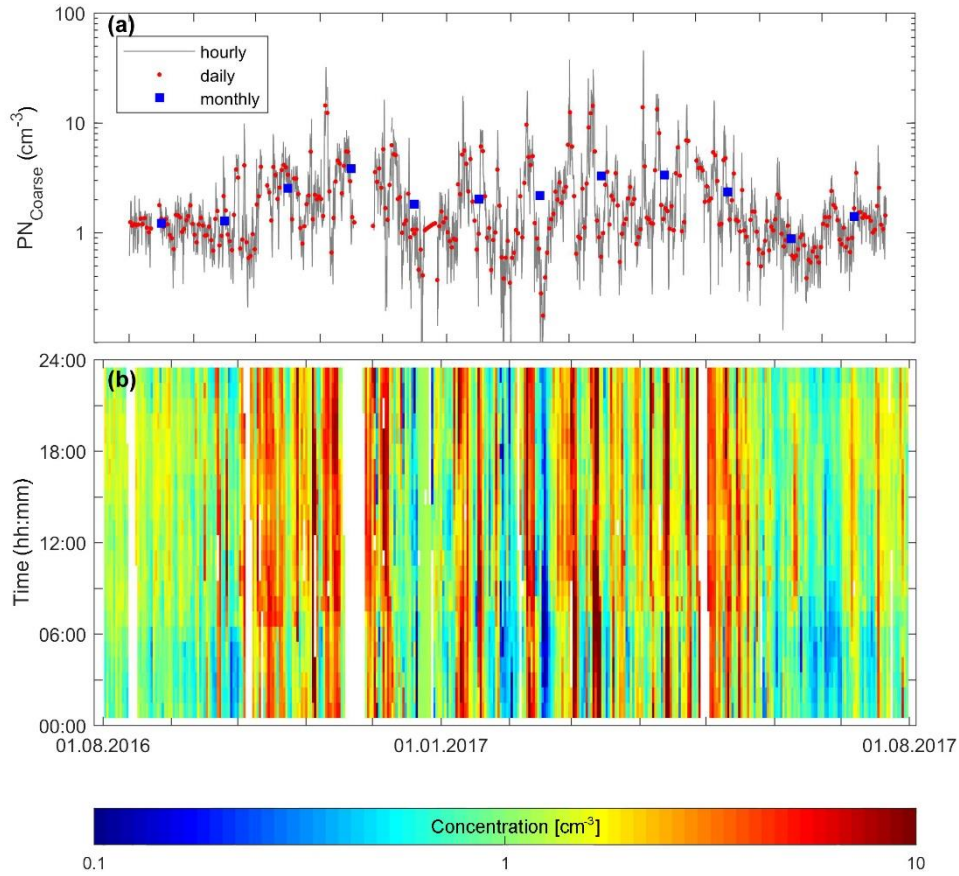

**Figure S8.** (a) Time series of the coarse mode (diameter 1–10 μm) particle number concentration and (b) date-time spectrum showing the day-to-day and hour-to-hour variation of the number concentration; the color bar scales the number concentration (cm<sup>-3</sup>).

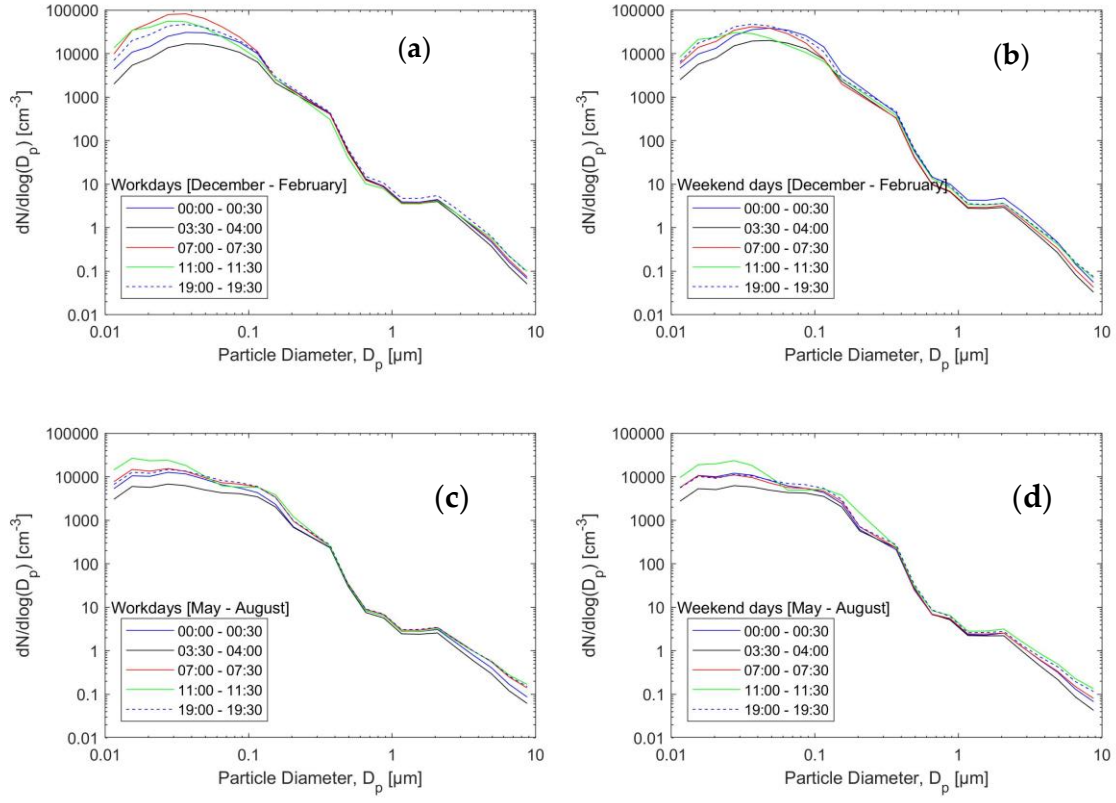

**Figure S9.** Mean particle number size distributions during (a,b) cold period (i.e. December–February) and (c,d) warm period (i.e., May–August). The mean distributions are shown for different times of the day on workdays (left panel) and weekend days (right panel).



**Table S2:** Monthly statistics for the main particle size fractions [concentrations in units of cm<sup>-3</sup>].

|                          | Year | Month     | Mean  | STD   | min  | 5%   | 25%   | Median | 75%   | 95%   | Max    |
|--------------------------|------|-----------|-------|-------|------|------|-------|--------|-------|-------|--------|
| Submicron<br>0.01–1 µm   | 2016 | August    | 12008 | 6079  | 2457 | 3821 | 7956  | 10684  | 14902 | 24171 | 39170  |
|                          |      | September | 14310 | 8184  | 2269 | 4662 | 8595  | 12312  | 18549 | 29909 | 57844  |
|                          |      | October   | 21241 | 11950 | 2708 | 6069 | 13180 | 18652  | 26624 | 44895 | 88372  |
|                          |      | November  | 27686 | 18177 | 3314 | 6288 | 14280 | 22941  | 37266 | 65174 | 101684 |
|                          |      | December  | 37007 | 22983 | 3238 | 7845 | 20003 | 34171  | 48858 | 78212 | 148735 |
|                          | 2017 | January   | 37356 | 24109 | 2920 | 8634 | 19471 | 33920  | 49437 | 74830 | 213713 |
|                          |      | February  | 32501 | 18352 | 4939 | 8479 | 18712 | 29607  | 43091 | 68023 | 123148 |
|                          |      | March     | 23760 | 13691 | 3356 | 6804 | 13505 | 20847  | 30938 | 50955 | 91391  |
|                          |      | April     | 19745 | 11869 | 4245 | 6814 | 12270 | 17394  | 24540 | 41421 | 141512 |
|                          |      | May       | 17935 | 8709  | 2325 | 6385 | 11443 | 16655  | 22578 | 33825 | 57065  |
|                          |      | June      | 15548 | 8921  | 3706 | 5665 | 9010  | 13058  | 19754 | 34170 | 56820  |
|                          |      | July      | 16247 | 9200  | 2170 | 4745 | 9805  | 14245  | 21042 | 33886 | 60186  |
| Ultrafine<br>0.01–0.1 µm | 2016 | August    | 8050  | 4190  | 1316 | 2363 | 5260  | 7088   | 10119 | 16539 | 24254  |
|                          |      | September | 9704  | 5651  | 1271 | 3033 | 5709  | 8452   | 12398 | 20726 | 39384  |
|                          |      | October   | 14467 | 7994  | 1707 | 4178 | 9132  | 12673  | 18098 | 29546 | 60417  |
|                          |      | November  | 18923 | 12183 | 2336 | 4357 | 9971  | 15976  | 25488 | 43381 | 68381  |
|                          |      | December  | 25795 | 15805 | 2164 | 5434 | 14239 | 23882  | 33953 | 55163 | 99753  |
|                          | 2017 | January   | 25886 | 16657 | 1856 | 5930 | 13485 | 23622  | 34713 | 51814 | 149861 |
|                          |      | February  | 22496 | 12785 | 3384 | 5732 | 13016 | 20635  | 29765 | 47315 | 83275  |
|                          |      | March     | 16461 | 9396  | 2142 | 4712 | 9571  | 14527  | 21088 | 35312 | 61735  |
|                          |      | April     | 13769 | 8123  | 2770 | 4704 | 8567  | 12157  | 17040 | 28607 | 95181  |
|                          |      | May       | 12441 | 5897  | 1550 | 4347 | 8035  | 11693  | 15700 | 23819 | 38512  |
|                          |      | June      | 10742 | 6007  | 2502 | 3907 | 6341  | 9164   | 13462 | 23359 | 35194  |
|                          |      | July      | 11185 | 6266  | 1158 | 3239 | 6832  | 9861   | 14281 | 23419 | 41020  |
| Accumulation<br>0.1–1 µm | 2016 | August    | 1337  | 447   | 138  | 653  | 1044  | 1326   | 1594  | 2134  | 3056   |
|                          |      | September | 1216  | 451   | 111  | 606  | 900   | 1172   | 1470  | 2035  | 3458   |
|                          |      | October   | 1360  | 842   | 102  | 468  | 834   | 1192   | 1636  | 2781  | 9005   |
|                          |      | November  | 1385  | 1020  | 141  | 280  | 815   | 1183   | 1559  | 3613  | 6362   |
|                          |      | December  | 1413  | 1120  | 87   | 262  | 658   | 1140   | 1849  | 3568  | 8521   |
|                          | 2017 | January   | 1472  | 1087  | 80   | 345  | 804   | 1214   | 1856  | 3421  | 8432   |
|                          |      | February  | 1632  | 1158  | 198  | 536  | 938   | 1329   | 1958  | 3647  | 9687   |
|                          |      | March     | 1226  | 691   | 217  | 435  | 752   | 1104   | 1538  | 2355  | 5052   |
|                          |      | April     | 1148  | 614   | 26   | 497  | 786   | 1034   | 1350  | 2176  | 5745   |
|                          |      | May       | 1009  | 442   | 184  | 449  | 728   | 940    | 1212  | 1781  | 5137   |
|                          |      | June      | 937   | 368   | 28   | 351  | 718   | 920    | 1118  | 1572  | 3112   |
|                          |      | July      | 1076  | 409   | 23   | 456  | 793   | 1067   | 1322  | 1752  | 2793   |
| Coarse<br>1–10 µm        | 2016 | August    | 1.2   | 0.4   | 0.3  | 0.7  | 1.0   | 1.2    | 1.4   | 1.9   | 2.3    |
|                          |      | September | 1.3   | 1.2   | 0.2  | 0.5  | 0.7   | 1.0    | 1.3   | 3.8   | 9.9    |
|                          |      | October   | 2.5   | 1.4   | 0.5  | 0.7  | 1.5   | 2.4    | 3.3   | 5.1   | 10.9   |
|                          |      | November  | 3.8   | 4.1   | 0.3  | 0.7  | 1.5   | 2.9    | 4.5   | 10.8  | 32.4   |
|                          |      | December  | 1.8   | 2.0   | 0.0  | 0.3  | 0.9   | 1.2    | 1.8   | 5.9   | 16.3   |
|                          | 2017 | January   | 2.0   | 2.3   | 0.1  | 0.3  | 0.7   | 1.2    | 2.4   | 6.6   | 17.6   |
|                          |      | February  | 2.2   | 2.5   | 0.1  | 0.2  | 0.7   | 1.4    | 2.9   | 6.4   | 19.6   |
|                          |      | March     | 3.3   | 4.7   | 0.3  | 0.5  | 1.0   | 1.7    | 3.1   | 13.9  | 37.9   |
|                          |      | April     | 3.3   | 5.1   | 0.3  | 0.6  | 1.1   | 1.6    | 3.2   | 12.0  | 45.8   |
|                          |      | May       | 2.4   | 1.9   | 0.2  | 0.5  | 1.1   | 1.8    | 3.3   | 5.4   | 16.1   |
|                          |      | June      | 0.9   | 0.6   | 0.1  | 0.3  | 0.6   | 0.8    | 1.0   | 1.8   | 4.9    |
|                          |      | July      | 1.4   | 0.7   | 0.3  | 0.6  | 0.9   | 1.3    | 1.6   | 3.0   | 6.3    |
